# Supplementary material for: Exposures and Health Risks from Volatile Organic Compounds in Communities Located near Oil and Gas Exploration and Production Activities in Colorado (U.S.A.)
Source: Int J Environ Res Public Health. 2018 Jul 16;15(7):1500. doi: 10.3390/ijerph15071500 (PMC6069077; doi:10.3390/ijerph15071500)
Supplement: Supplementary file 1 [file ijerph-15-01500-s001.xlsx]

## Sheet: S Table 1
Y = yes, substances were identified as being emitted from OG operations
CAS	Substance	CDPHE Operator Emissions Inventory	Collett et al. [44, 45]	Gilman et al. [13]
526-73-8	1,2,3-Trimethylbenzene		Y
95-63-6	1,2,4-Trimethylbenzene		Y	Y
108-67-8	1,3,5-Trimethylbenzene		Y	Y
6876-23-9	1,2-Dimethylcyclohexane (trans)			Y
638-04-0	1,3-Dimethylcyclohexane (cis)			Y
591-21-9	1,3-Dimethylcyclohexane(trans)			Y
106-98-9	1-Butene		Y
109-67-1	1-Pentene		Y
540-84-1	2,2,4-Trimethylpentane		Y
565-75-3	2,3,4-Trimethylpentane		Y
565-59-3	2,3-Dimethylpentane		Y
108-08-7	2,4-Dimethylpentane		Y
590-19-1	2-Butene (cis)		Y
624-64-6	2-Butene (trans)		Y
627-20-3	2-Pentene (cis)		Y
646-04-8	2-Pentene (trans)		Y
592-27-8	2-Methylheptane		Y
591-76-4	2-Methylhexane		Y
589-34-4	3-Methylhexane		Y
107-83-5	2-Methylpentane			Y
589-81-1	3-Methylheptane		Y
96-14-0	3-Methylpentane			Y
71-43-2	Benzene	Y	Y	Y
110-82-7	Cyclohexane		Y	Y
287-92-3	Cyclopentane		Y	Y
74-84-0	Ethane		Y	Y
100-41-4	Ethylbenzene	Y	Y	Y
1678-91-7	Ethylcyclohexane			Y
74-85-1	Ethylene		Y	Y
142-82-5	Heptane		Y	Y
110-54-3	Hexane	Y	Y	Y
75-28-5	Isobutane		Y	Y
78-78-4	Isopentane		Y	Y
78-79-5	Isoprene		Y
98-82-8	Isopropylbenzene		Y
141-93-5	m-Diethylbenzene		Y
67-56-1	Methanol	Y
108-87-2	Methylcyclohexane		Y	Y
96-37-7	Methylcyclopentane			Y
25550-14-5	m-Ethyltoluene		Y
108-38-3	m/p-Xylene	Y	Y	Y
106-97-8	n-Butane		Y	Y
124-18-5	n-Decane		Y	Y
111-84-2	n-Nonane		Y	Y
111-65-9	n-Octane		Y	Y
109-66-0	n-Pentane		Y	Y
103-65-1	n-Propylbenzene		Y	Y
1120-21-4	n-Undecane			Y
25550-14-5	o-Ethyltoluene		Y
95-47-6	o-Xylene		Y	Y
105-05-5	p-Diethylbenzene		Y
622-96-8	p-Ethyltoluene		Y
74-98-6	Propane		Y	Y
115-07-1	Propylene		Y	Y
100-42-5	Styrene		Y
108-88-3	Toluene	Y	Y	Y

## Sheet: S Table 2
Reference	Description	Distance from Closest OG site (ft)	Operation Type/Phase	Year(s) of data collection	# Samples	Sample Collection Duration/Monitor Type	Sampling Frequency and Duration	Time of Day	Season	Notes(Sample numbers, Sites, etc)
CDPHE Platteville [17]	Ambient air monitoring in oil and gas region with active development	950	Various	2011/2012	95	3-hour integrated	Weekly for 365 days	6-9 AM	All	Platteville Site
CDPHE Platteville [17]	Ambient air monitoring in oil and gas region with active development	950	Various	2013	51	3-hour integrated	Weekly for 365 days	6-9 AM	All	Platteville Site
CDPHE Platteville [17]	Ambient air monitoring in oil and gas region with active development	950	Various	2014	56	3-hour integrated	Weekly for 365 days	6-9 AM	All	Platteville Site
CDPHE Platteville [17]	Ambient air monitoring in oil and gas region with active development	950	Various	2015	48	3-hour integrated	Weekly for 365 days	6-9 AM	All	Platteville Site
CDPHE Platteville [17]	Ambient air monitoring in oil and gas region with active development	950	Various	2016	58	3-hour integrated	Weekly for 365 days	6-9 AM	All	Platteville Site
CDPHE Platteville [17]	Ambient air monitoring in oil and gas region with active development	950	Various	2017	61	3-hour integrated	Weekly for 365 days	6-9 AM	All	Platteville Site
CDPHE Erie [21]	Site specific air monitoring	850	Completion	2012	18	3-hour integrated	Every 3 days for 30 days then daily for 16 days	6-9 AM	Summer	Erie site
CDPHE Erie [21]	Site specific air monitoring	1650	Completion	2012	18	3-hour integrated	Every 3 days for 30 days then daily for 16 days	6-9 AM	Summer	Erie Site
FRAPPE WAS [20]	Site specific air monitoring	>500	Methane enhancement, Well pads	2014	1	1-minute grab sample	Once	Daytime	Summer	5010
FRAPPE WAS [20]	Site specific air monitoring	>500	Oil tank	2014	1	1-minute grab sample	Once	Daytime	Summer	5058
FRAPPE WAS [20]	Site specific air monitoring	>500	Oil well pad separator	2014	1	1-minute grab sample	Once	Daytime	Summer	6115
FRAPPE WAS [20]	Site specific air monitoring	>500	Oil and or gas	2014	1	1-minute grab sample	Once	Daytime	Summer	6149
FRAPPE WAS [20]	Site specific air monitoring	>500	Pipeline	2014	2	1-minute grab sample	Once	Daytime	Summer	2107, 1182
FRAPPE WAS [20]	Site specific air monitoring	>500	Drilling	2014	1	1-minute grab sample	Once	Daytime	Summer	2223
FRAPPE WAS [20]	Site specific air monitoring	>500	Pipeline	2014	1	1-minute grab sample	Once	Daytime	Summer	1606
FRAPPE WAS [20]	Site specific air monitoring	>500	Drilling	2014	1	1-minute grab sample	Once	Daytime	Summer	2035
FRAPPE WAS [20]	Site specific air monitoring	>500	Processing plant	2014	2	1-minute grab sample	Once	Daytime	Summer	2029, 2089
FRAPPE WAS [20]	Site specific air monitoring	>500	Processing plant	2014	1	1-minute grab sample	Once	Daytime	Summer	2194
FRAPPE WAS [20]	Site specific air monitoring	>500	Oil and or gas	2014	35	1-minute grab sample	Once	Daytime	Summer	2092, 1016, 2315, 1258, 1196, 2303, 1001, 2140, 1253, 1257, 1057, 1162, 2312, 1040, 2214, 1107, 1216, 1025, 2054, 2242, 1251, 2171, 2043, 2014, 2083, 1163, 1002, 1204, 2148, 1164, 1280, 2057, 2015, 2004, 1032
FRAPPE WAS [20]	Site specific air monitoring	>500	Oil and or gas	2014	1	1-minute grab sample	Once	Daytime	Summer	1200
FRAPPE WAS [20]	Site specific air monitoring	>500	Produced water	2014	1	1-minute grab sample	Once	Daytime	Summer	232
FRAPPE WAS [20]	Site specific air monitoring	>500	Well pad	2014	2	1-minute grab sample	Once	Daytime	Summer	2076, 1101
FRAPPE WAS [20]	Site specific air monitoring	>500	Well pad	2014	1	1-minute grab sample	Once	Daytime	Summer	2310
FRAPPE WAS [20]	Site specific air monitoring	>500	Oil and gas	2014	1	1-minute grab sample	Once	Daytime	Summer	1146
FRAPPE WAS [20]	Site specific air monitoring	>500	Oil and gas	2014	1	1-minute grab sample	Once	Daytime	Summer	7349
FRAPPE WAS [20]	Site specific air monitoring	>500	Oil and gas	2014	1	1-minute grab sample	Once	Daytime	Summer	1005
Gilman et al. [13]	Site specific air monitoring	984	Production	2011	544	5-minute integrated	Every 30 minutes for 19 days	24-hours	Winter	BAO
Halliday et al. [22]	Ambient air monitoring in oil and gas region with active development	1550	Drilling, hydraulic fracturing	2014	28009	1-second direct read	every minute for 2 months	24-hours	Summer	PAO
Helmig et al. [15]	Ambient air monitoring in region adjacent to active development	1470-2050	Unknown	2014	47	3 –day integrated	Every 6-10 days for 86 days	24-hours	Summer	Boulder Area
Swarthout et al. [19]	Ambient air monitoring in oil and gas region with active development	984	Production	2011	550	1-minute grab sample	Hourly for 23 days	24-hours	Spring	BAO
Thompson et al. [16]	Ambient air monitoring in oil and gas region with active development	350-1400	Production	2013	30	5-minute grab samples, 3-hour integrated, 24-hour integrated	Random sampling over 77 days	24-hours	Spring
Piceance Basin
Colborn et al. [14]	Site specific air monitoring	3700	Drilling/ production	2010/2011	48	24-hour integrated	Weekly for 365 days	24-hours	All
Garfield Cty. Bell-Melton [18]	Ambient air monitoring in oil and gas region with active development	500	Various	2008	59	24-hour integrated	Weekly for 365 days	24-hours	All	BRCO
Garfield Cty. Bell-Melton [18]	Ambient air monitoring in oil and gas region with active development	500	Various	2009	56	24-hour integrated	Weekly for 365 days	24-hours	All	BRCO
Garfield Cty. Bell-Melton [18]	Ambient air monitoring in oil and gas region with active development	500	Various	2010	18	24-hour integrated	Weekly for 365 days	24-hours	All	BRCO
Garfield Cty. Bell-Melton [18]	Ambient air monitoring in oil and gas region with active development	500	Various	2011	51	24-hour integrated	Weekly for 365 days	24-hours	All	BRCO
Garfield Cty. Bell-Melton [18]	Ambient air monitoring in oil and gas region with active development	500	Various	2012	53	24-hour integrated	Weekly for 365 days	24-hours	All	BRCO
Garfield Cty. Bell-Melton [18]	Ambient air monitoring in oil and gas region with active development	500	Various	2013	55	24-hour integrated	Weekly for 365 days	24-hours	All	BRCO
Garfield Cty. Bell-Melton [18]	Ambient air monitoring in oil and gas region with active development	500	Various	2014	50	24-hour integrated	Weekly for 365 days	24-hours	All	BRCO
Garfield Cty. Bell-Melton [18]	Ambient air monitoring in oil and gas region with active development	500	Various	2015	48	24-hour integrated	Weekly for 365 days	24-hours	All	BRCO
Garfield Cty. Battlement Mesa [18]	Ambient air monitoring in oil and gas region with active development	800	Various	2010	55	24-hour integrated	Weekly for 365 days	24-hours	All	BMCO
Garfield Cty. Battlement Mesa [18]	Ambient air monitoring in oil and gas region with active development	800	Various	2011	54	24-hour integrated	Weekly for 365 days	24-hours	All	BMCO
Garfield Cty. Battlement Mesa [18]	Ambient air monitoring in oil and gas region with active development	800	Various	2012	58	24-hour integrated	Weekly for 365 days	24-hours	All	BMCO
Garfield Cty. Battlement Mesa [18]	Ambient air monitoring in oil and gas region with active development	800	Various	2013	57	24-hour integrated	Weekly for 365 days	24-hours	All	BMCO
Garfield Cty. Battlement Mesa [18]	Ambient air monitoring in oil and gas region with active development	800	Various	2014	51	24-hour integrated	Weekly for 365 days	24-hours	All	BMCO
Garfield Cty. Battlement Mesa [18]	Ambient air monitoring in oil and gas region with active development	800	Various	2015	48	24-hour integrated	Weekly for 365 days	24-hours	All	BMCO
NA- Not applicable: Authors did not specify a specific oil and gas site or phase in relationship to air sampling

## Sheet: S Table 3
Table S3 - Mean and Maximum concentrations of VOCs across all datasets (ppbV)
		CDPHE Erie [21]				CDPHE Platteville [17]												FRAPPE WAS / DISCOVER AQ [20]																		Gilman et al. [13]		Halliday et al. [42]		Helmig et al. [15]		Swarthout et al. [19]		Thompson et al. [16]		Garfield Cty. BRCO [18]
		2012		2012		2012		2013		2014		2015		2016		2017		2014	2014	2014	2014	2014	2014	2014	2014	2014	2014	2014	2014	2014	2014	2014	2014	2014	2014	2011		2014		2014		2011		2013		2008		2009
CAS	Analyte	Mean	Maximum	Mean	Maximum	Mean	Maximum	Mean	Maximum	Mean	Maximum	Mean	Maximum	Mean	Maximum	Mean	Maximum	Sample 1	Sample 2	Sample 3	Sample 4	Sample 5	Sample 6	Sample 7	Sample 8	Sample 9	Sample 10	Sample 11	Sample 12	Sample 13	Sample 14	Sample 15	Sample 16	Sample 17	Sample 18	Mean	Maximum	Mean	Max	Mean	Maximum	Mean	Maximum	Mean	Maximum	Mean	Maximum	Mean	Maximum
526-73-8	1,2,3-Trimethylbenzene	NT	NT	NT	NT	0.0141626	0.057	0.0350327	0.112222	0.0258194	0.132222	0.0327523	0.113333	0.0152337	0.0561111	0.0101089	0.0355556	0.145	0.048	0.025	0.004	0.0115	0.023	0.059	0.046	0.004	0.00728571	0.019	ND	0.028	0.003	ND	ND	0.005	0.003	0.007	0.025	NT	NT	NT	NT	0.004	0.037	NT	NT	0.015	0.171	0.018	0.172
95-63-6	1,2,4-Trimethylbenzene	0.069	0.363	0.061	2.9	0.0720251	0.222222	0.189649	0.943333	0.134117	0.68	0.154127	0.768889	0.0677874	0.242222	0.0299129	0.392222	0.655	0.187	0.104	0.012	0.0415	0.091	0.223	0.189	0.014	0.0167727	0.065	0.008	0.084	0.018	0.004	0.005	0.007	0.008	0.03	0.094	NT	NT	NT	NT	0.018	0.294	NT	NT	0.057	0.629	0.057	0.602
108-67-8	1,3,5-Trimethylbenzene	NT	NT	NT	NT	0.0286357	0.131111	0.0536035	0.2	0.0454901	0.142222	0.0435694	0.144444	0.0288295	0.114444	0.0188235	0.0755556	0.192	0.077	0.05	0.01	0.022	0.04	0.081	0.08	0.0065	0.0106667	0.029	0.005	0.033	0.014	ND	ND	0.005	0.003	0.012	0.14	NT	NT	NT	NT	0.006	0.076	NT	NT	0.032	0.17	0.03	0.244
106-98-9	1-Butene	NT	NT	NT	NT	0.100862	1.9425	0.019375	0.019375	0.044	0.044	0.0129089	0.02625	0.0508448	1.18	0.0587255	0.61	NT	NT	NT	NT	NT	NT	NT	NT	NT	NT	NT	NT	NT	NT	NT	NT	NT	NT	NT	NT	NT	NT	0.787741	4.75986	0.017	0.192	0.14	0.34	0.627	2.06	0.303	1.95
109-67-1	1-Pentene	0.059	0.142	0.065	0.376	0.0631916	0.264	0.0632922	0.1826	0.0472929	0.1176	0.0584292	0.222	0.0423695	0.304	0.0338235	0.526	NT	NT	NT	NT	NT	NT	NT	NT	NT	NT	NT	NT	NT	NT	NT	NT	NT	NT	NT	NT	NT	NT	0.56699	1.46522	0.008	0.08	0.11	0.25	0.034	0.112	0.038	0.132
540-84-1	2,2,4-Trimethylpentane	NT	NT	NT	NT	0.0195296	0.13625	0.0191716	0.135	0.017375	0.017375	0.0324948	0.325	0.111957	0.51125	0.19636	1.5	3.285	3.381	0.959	0.155	0.685	0.452	0.21	0.587	0.1	0.105529	0.606	0.043	0.201	1.3975	0.09	0.013	0.121	0.025	NT	NT	NT	NT	NT	NT	0.044	0.306	NT	NT	0.037	0.461	0.032	0.53
565-75-3	2,3,4-Trimethylpentane	NT	NT	NT	NT	0.0254158	0.078375	0.0529694	0.1525	0.0368326	0.1325	0.037151	0.082875	0.0250884	0.084125	0.0133824	0.08375	NT	NT	NT	NT	NT	NT	NT	NT	NT	NT	NT	NT	NT	NT	NT	NT	NT	NT	NT	NT	NT	NT	NT	NT	0.009	0.028	NT	NT	0.021	0.384	0.017	0.053
565-59-3	2,3-Dimethylpentane	0.085	0.261	0.089	0.227	0.183646	0.611429	0.314936	0.791429	0.249388	1.25571	0.204619	0.452857	0.139707	0.351429	0.145056	1.23286	NT	NT	NT	NT	NT	NT	NT	NT	NT	NT	NT	NT	NT	NT	NT	NT	NT	NT	NT	NT	NT	NT	NT	NT	0.031	0.206	NT	NT	0.13	0.451	0.122	0.507
108-08-7	2,4-Dimethylpentane	0.063	0.206	0.061	0.142	0.15049	0.491429	0.177345	0.538571	0.199724	1.19143	0.143792	0.32	0.107436	0.281429	0.119496	1.47143	1.187	1.344	0.404	0.111	0.4165	0.229	0.056	0.345	0.0905	0.0704571	0.317	0.056	0.089	1.0825	0.076	0.02	0.028	0.033	NT	NT	NT	NT	NT	NT	0.024	0.158	NT	NT	0.092	0.267	0.087	0.361
592-27-8	2-Methylheptane	0.052	0.163	0.062	0.156	0.147303	0.69	0.253463	0.6975	0.259873	1.5375	0.229413	0.55875	0.146524	0.44875	0.15277	1.22125	NT	NT	NT	NT	NT	NT	NT	NT	NT	NT	NT	NT	NT	NT	NT	NT	NT	NT	NT	NT	NT	NT	NT	NT	0.034	0.263	NT	NT	0.15	0.626	0.122	0.59
591-76-4	2-Methylhexane	NT	NT	NT	NT	0.565821	1.8	1.02257	2.74286	0.874464	4.14286	0.63246	1.36	0.393658	1.35857	0.326807	4.51429	NT	NT	NT	NT	NT	NT	NT	NT	NT	NT	NT	NT	NT	NT	NT	NT	NT	NT	NT	NT	NT	NT	NT	NT	5	29.4	NT	NT	0.354	1.18	0.321	1.39
107-83-5	2-Methylpentane	0.916	2.883	0.905	2.133	2.98517	9.71667	3.69343	14.9333	2.7053	20.6667	2.13826	4.76667	1.72463	5.18333	2.13778	28.6667	28.903	24.432	5.689	2.752	8.9005	5.36	0.909	5.469	1.9595	1.09409	5.228	0.99	0.625	26.768	1.826	0.137	0.514	0.305	0.36	1.9	NT	NT	NT	NT	0.47	3.17	NT	NT	1.67	5.83	1.36	6.25
589-81-1	3-Methylheptane	0.044	0.161	0.05	0.248	0.102134	0.425	0.179027	0.525	0.171415	1.04125	0.155604	0.36625	0.099569	0.29125	0.103321	0.81875	NT	NT	NT	NT	NT	NT	NT	NT	NT	NT	NT	NT	NT	NT	NT	NT	NT	NT	NT	NT	NT	NT	NT	NT	0.024	0.165	NT	NT	0.099	0.756	0.082	0.374
589-34-4	3-Methylhexane	NT	NT	NT	NT	0.538484	1.87143	0.905261	2.44286	0.756566	3.95714	0.507384	1.3	0.374416	1.02286	0.452507	4.48571	NT	NT	NT	NT	NT	NT	NT	NT	NT	NT	NT	NT	NT	NT	NT	NT	NT	NT	NT	NT	NT	NT	NT	NT	NT	NT	NT	NT	0.327	1.07	0.231	1.18
96-14-0	3-Methylpentane	0.494	1.603	0.477	1.14	1.5887	5.23333	1.95694	7.68333	1.43658	11.25	1.1198	2.63333	0.926382	3.16667	1.17768	15.4667	15.179	13.207	3.611	1.433	4.7175	2.788	0.488	2.89	1.0185	0.549229	2.792	0.579	0.36	14.4165	0.862	0.06	0.15	0.139	0.57	2.9	NT	NT	NT	NT	0.245	1.7	NT	NT	0.866	3	0.707	3.3
71-43-2	Benzene	0.35	0.643	0.228	0.478	0.957739	8.53333	0.905441	2.38333	0.682961	4.01667	0.626753	1.57167	0.58631	2.8	0.627484	5.25	8.637	2.419	1.144	0.231	3.5615	0.69	0.895	1.585	0.544	0.324371	1.347	0.265	0.506	7.4245	0.458	0.064	0.182	0.091	0.29	1.6	0.53	5.12	0.504744	1.12853	0.186	0.865	0.57	0.96	0.42	4.27	0.43	1.42
590-18-1	Butene (cis-2-)	NT	NT	NT	NT	0.0757224	0.945	0.0740245	0.29	0.0323683	0.22725	0.0403698	0.1515	0.081828	1.805	0.109142	1.675	NT	NT	NT	NT	NT	NT	NT	NT	NT	NT	NT	NT	NT	NT	NT	NT	NT	NT	NT	NT	NT	NT	NT	NT	0.013	0.169	NT	NT	0.026	0.066	0.031	0.162
624-64-6	Butene (trans-2-)	NT	NT	NT	NT	0.0913368	1.11	0.10337	0.3675	0.0432031	0.305	0.0371901	0.1985	0.100292	2.105	0.115564	1.54	NT	NT	NT	NT	NT	NT	NT	NT	NT	NT	NT	NT	NT	NT	NT	NT	NT	NT	NT	NT	NT	NT	NT	NT	0.014	0.224	0.05	0.1	0.054	1.46	0.039	0.201
110-82-7	Cyclohexane	0.377	1.372	0.364	0.917	1.11731	4.28333	2.09367	7.03333	1.57745	9.51667	1.13213	2.58333	0.766351	1.8	0.841601	9.53333	12.206	14.315	3.083	0.795	3.1325	1.983	0.641	2.746	0.565	0.411686	2.49	0.303	0.212	8.4375	0.511	0.038	0.117	0.116	0.3	1.4	NT	NT	NT	NT	0.143	1.38	0.21	0.79	1.48	30.5	0.796	3.65
287-92-3	Cyclopentane	0.208	0.552	0.199	0.424	0.728553	2.4	0.938376	3.68	0.724321	5.26	0.581442	1.358	0.43461	1.312	0.533863	5.48	11.037	6.777	1.334	0.576	2.547	1.606	0.229	1.459	0.363	0.238629	1.39	0.186	0.121	5.087	0.363	0.02	0.073	0.073	0.21	3.4	NT	NT	0.880386	4.48468	0.117	0.871	0.14	0.55	0.277	1.02	0.221	0.964
638-04-0	Dimethylcyclohexane(cis-13-)	NT	NT	NT	NT	NT	NT	NT	NT	NT	NT	NT	NT	NT	NT	NT	NT	NT	NT	NT	NT	NT	NT	NT	NT	NT	NT	NT	NT	NT	NT	NT	NT	NT	NT	0.027	0.1	NT	NT	NT	NT	NT	NT	NT	NT	NT	NT	NT	NT
6876-23-9	Dimethylcyclohexane(trans-12-)	NT	NT	NT	NT	NT	NT	NT	NT	NT	NT	NT	NT	NT	NT	NT	NT	NT	NT	NT	NT	NT	NT	NT	NT	NT	NT	NT	NT	NT	NT	NT	NT	NT	NT	0.007	0.03	NT	NT	NT	NT	NT	NT	NT	NT	NT	NT	NT	NT
591-21-9	Dimethylcyclohexane(trans-13-)	NT	NT	NT	NT	NT	NT	NT	NT	NT	NT	NT	NT	NT	NT	NT	NT	NT	NT	NT	NT	NT	NT	NT	NT	NT	NT	NT	NT	NT	NT	NT	NT	NT	NT	0.004	0.01	NT	NT	NT	NT	NT	NT	NT	NT	NT	NT	NT	NT
74-84-0	Ethane	24.656	74.5	21.908	50.5	109.437	398.5	138.676	680	93.8012	780	77.4823	275.5	77.6638	306	95.299	1325	258.838	151.975	322.904	148.209	1061.75	408.741	13.691	133.005	149.931	30.3545	135.515	121.545	6.996	217.418	41.134	2.725	12.397	8.099	35	300	NT	NT	17.1933	34.7916	22.1	101.7	27	84.1	70.7	334	54.9	311
100-41-4	Ethylbenzene	0.047	0.093	0.057	20.875	0.0716632	0.305	0.123343	0.3725	0.108382	0.41375	0.109419	0.27125	0.0879957	0.3	0.0879657	0.4975	0.448	0.325	0.166	0.072	0.166	0.269	0.204	0.124	0.021	0.03805	0.142	ND	0.149	0.12	0.016	0.011	ND	0.013	0.03	0.15	NT	NT	0.306295	5.8409	0.017	0.201	0.05	0.1	0.06	0.999	0.055	0.272
1678-91-7	Ethylcyclohexane	NT	NT	NT	NT	NT	NT	NT	NT	NT	NT	NT	NT	NT	NT	NT	NT	NT	NT	NT	NT	NT	NT	NT	NT	NT	NT	NT	NT	NT	NT	NT	NT	NT	NT	0.014	0.05	NT	NT	NT	NT	NT	NT	NT	NT	NT	NT	NT	NT
74-85-1	Ethylene	1.49	2.285	1.448	2.765	2.461	7.8	3.20873	10.35	2.22759	6.05	2.34216	10	2.13678	7.45	2.07676	9.05	1.65	0.448	0.197	0.865	0.665	1.018	8.605	0.672	3.9935	0.4554	1.417	0.081	2.109	0.1045	0.419	0.097	0.255	0.187	NT	NT	NT	NT	7.66022	40.5746	0.434	4.19	0.45	0.87	0.574	1.32	1.09	2.56
75-28-5	Isobutane	2.9	6.75	2.562	6.6	16.8203	51.25	21.8839	108.25	15.2362	159.25	10.917	32.75	10.3708	44.5	11.0834	142.5	172.1	71.432	28.298	10.87	82.3585	21.349	2.561	19.801	12.185	4.6296	21.987	10.8	1.425	76.197	7.11	0.354	1.519	1.272	6	85	NT	NT	3.05162	7.6511	2.89	23	3.49	13.1	11.4	49.8	7.9	41.2
78-78-4	Isopentane	2.924	9.44	2.774	13.72	13.9784	41.8	17.9663	84	11.2297	126	8.16997	27.2	6.79064	27.6	9.0378	116.4	139.157	78.912	24.157	10.354	49.472	22.46	2.583	18.449	8.6875	3.97937	18.157	6.471	2.161	93.397	7.013	0.427	1.161	1.1	4.2	64	NT	NT	1.59618	4.48044	1.98	15.4	2.58	8.89	7.77	41.8	5.59	22.6
78-79-5	Isoprene	NT	NT	NT	NT	0.0901126	0.712	0.100047	0.64	0.0975054	0.654	0.0997583	0.658	0.0308616	0.39	0.0277059	0.27	0.336	0.024	LOD	0.016	0.069	0.022	0.137	0.029	0.0105	ND	0.219	0.019	0.056	0.174	0.04	0.332	0.103	0.255	0.004	0.024	NT	NT	NT	NT	0.008	0.03			0.103	1.2	0.138	0.766
98-82-8	Isopropylbenzene	NT	NT	NT	NT	0.0102	0.0274444	0.0107571	0.0398889	0.011369	0.0258889	0.00887847	0.0191111	0.0059636	0.0142222	0.00623094	0.0277778	NT	NT	NT	NT	NT	NT	NT	NT	NT	NT	NT	NT	NT	NT	NT	NT	NT	NT	0.002	0.006	NT	NT	NT	NT	0.002	0.016	NT	NT	0.017	0.061	0.015	0.029
141-93-5	m-Diethylbenzene	NT	NT	NT	NT	0.0217711	0.0898	0.0119755	0.012	0.0369018	0.18	0.0138313	0.0572	0.0126897	0.0337	0.00867647	0.027	NT	NT	NT	NT	NT	NT	NT	NT	NT	NT	NT	NT	NT	NT	NT	NT	NT	NT	NT	NT	NT	NT	NT	NT	0.004	0.045	NT	NT	0.014	0.097	0.018	0.071
67-56-1	Methanol	NT	NT	NT	NT	NT	NT	NT	NT	NT	NT	NT	NT	NT	NT	NT	NT	NT	NT	NT	NT	NT	NT	NT	NT	NT	NT	NT	NT	NT	NT	NT	NT	NT	NT	5.4	41	NT	NT	NT	NT	4.66	13.9	NT	NT	NT	NT	NT	NT
108-87-2	Methylcyclohexane	0.376	10.5	0.394	7.03	1.0301	3.85714	1.73961	4.6	1.31188	8.45714	1.11443	2.55714	0.725493	1.98571	0.870756	8.37143	13.815	16.269	4.855	0.687	3.3055	1.811	1.096	3.137	0.4855	0.455257	2.843	0.286	0.159	8.328	0.42	ND	0.068	0.062	0.28	2.6	NT	NT	NT	NT	0.143	1.38	0.48	1.51	1.46	5.47	1.25	5.96
96-37-7	Methylcyclopentane	0.476	1.6	0.454	1.03	1.46617	5.11667	1.77671	5.71667	1.77086	11.2333	1.44826	3.35	0.987155	2.68333	1.17745	11.8	18.331	15.84	3.244	1.061	4.161	2.713	0.686	3.198	0.696	0.488629	2.934	0.345	0.333	11.0705	0.635	0.057	0.116	0.135	1.3	6.7	NT	NT	NT	NT	0.263	1.51	NT	NT	0.828	2.58	0.67	3.02
620-14-4	m-Ethyltoluene	NT	NT	NT	NT	0.0387906	0.167778	0.0865033	0.327778	0.0674613	0.233333	0.0790833	0.237778	0.0426226	0.168889	0.360458	1.74	0.285	0.123	0.07	0.008	0.03	0.044	0.098	0.085	0.007	0.0123889	0.037	0.004	0.058	0.013	ND	ND	0.004	0.004	0.02	0.061	NT	NT	NT	NT	0.01	0.154	NT	NT	0.037	0.331	0.041	0.287
108-38-3	m/p-Xylene	0.161	0.399	0.214	49.875	0.291955	1.1525	0.515463	1.5	0.428777	1.725	0.367297	0.92625	0.276754	0.76375	0.21239	1.005	3.334	2.231	1.823	0.339	1.621	0.625	1.005	1.058	0.178	0.218371	0.92	0.135	0.709	1.6025	0.158	0.035	0.115	0.079	0.11	0.61	NT	NT	0.432625	3.31112	0.074	1.05	0.17	0.41	0.314	2.28	0.298	1.17
106-97-8	n-Butane	6.844	15.975	6.181	16.05	39.1456	119	51.7143	262.5	37.3947	387.5	26.8483	78.5	23.1973	79.5	25.6923	322.5	332.982	196.929	49.4	27.9	164.733	54.876	6.403	54.057	23.1535	11.3327	52.71	19.339	2.549	203.283	18.178	0.827	3.621	3.496	14	184	NT	NT	4.07182	13.2348	7.06	59.4	8.09	30.9	12.8	57.5	10.4	66.2
124-18-5	n-Decane	0.035	0.114	0.063	25.8	0.0475263	0.237	0.103516	0.257	0.0999768	0.377	0.11389	0.4	0.0624034	0.18	0.0582157	0.367	NT	NT	NT	NT	NT	NT	NT	NT	NT	NT	NT	NT	NT	NT	NT	NT	NT	NT	0.027	0.17	NT	NT	0.363422	1.83372	0.01	0.079	NT	NT	0.288	12	0.121	1.06
142-82-5	n-Heptane	0.287	1.076	0.298	0.769	0.78677	3.25714	1.38128	4.12857	1.07609	7.25714	0.900813	2.14286	0.678963	1.88571	0.845658	8.5	12.512	15.798	4.063	0.893	3.309	2.535	0.819	3.972	0.63	0.504114	2.961	0.267	0.23	8.7845	0.506	0.042	0.279	0.086	0.32	2.8	NT	NT	0.177851	0.340046	0.15	1	0.23	0.73	0.677	2.33	0.59	2.77
110-54-3	n-Hexane	1.084	3.633	1.005	2.4	3.41083	11.8167	4.12104	16.3833	3.8559	29.6667	3.03226	7.1	2.20397	5.65	2.79111	36.5	44.63	41.679	6.907	3.61	12.3655	7.779	1.426	9.542	2.6505	1.495	8.565	1.189	0.621	38.036	2.165	0.112	0.399	0.328	1.1	12	NT	NT	1.16064	4.00546	0.528	4	1.12	3.24	1.81	6.27	1.52	7.08
111-84-2	n-Nonane	0.038	0.131	0.046	1.733	0.0763251	0.25	0.136429	0.365556	0.135438	0.583333	0.132248	0.416667	0.0937663	0.277778	0.13427	0.654444	NT	NT	NT	NT	NT	NT	NT	NT	NT	NT	NT	NT	NT	NT	NT	NT	NT	NT	0.039	0.27	NT	NT	3.25678	14.8647	0.019	0.124	NT	NT	0.13	0.477	0.119	0.587
111-65-9	n-Octane	0.115	1.5	0.134	1.004	0.258001	1.0875	0.454995	1.2225	0.466683	2.5875	0.402646	1.0325	0.258513	0.81	0.273762	1.7625	3.569	3.732	2.416	0.206	1.041	0.405	0.354	0.986	0.1165	0.169182	0.826	0.066	0.093	1.728	0.138	0.022	0.071	0.027	0.095	0.76	NT	NT	0.0973217	0.220575	0.052	0.451	0.1	0.33	0.343	1.21	0.291	1.44
109-66-0	n-Pentane	NT	NT	NT	NT	12.9999	42	17.456	89	12.8817	133.4	9.11812	23.4	7.33079	22.2	8.85969	117	160.284	95.816	19.764	11.73	47.9855	27.123	2.897	23.55	9.1365	4.35571	22.418	4.902	1.251	102.879	7.705	0.346	1.255	1.218	4.7	73	NT	NT	1.53663	4.06389	2.01	15.4	2.55	9.09	5.11	21	4.03	18.2
103-65-1	n-Propylbenzene	NT	NT	NT	NT	0.0172123	0.0585556	0.0324183	0.123333	0.0267133	0.0974444	0.0278333	0.0872222	0.0120964	0.0494444	0.00826797	0.0488889	NT	NT	NT	NT	NT	NT	NT	NT	NT	NT	NT	NT	NT	NT	NT	NT	NT	NT	0.004	0.015	NT	NT	NT	NT	0.004	0.031	NT	NT	0.017	0.144	0.017	0.081
1120-21-4	n-Undecane	0.023	0.043	0.026	4.664	0.0285976	0.227273	0.0606756	0.363636	0.0624091	0.354545	0.0514223	0.248182	0.0360118	0.133636	0.0502228	0.19	NT	NT	NT	NT	NT	NT	NT	NT	NT	NT	NT	NT	NT	NT	NT	NT	NT	NT	0.021	0.15	NT	NT	NT	NT	NT	NT	NT	NT	0.767	39.8	0.188	1.95
611-14-3	o-Ethyltoluene	NT	NT	NT	NT	0.0228965	0.0842222	0.0448693	0.157778	0.0396845	0.18	0.0386146	0.142222	0.0206724	0.0854444	0.00662309	0.0466667	0.107	0.041	0.026	ND	0.0125	0.019	0.047	0.031	0.005	0.00615385	0.011	ND	0.028	0.003	ND	ND	0.005	ND	0.02	0.061	NT	NT	NT	NT	0.003	0.034	NT	NT	0.029	0.244	0.026	0.292
95-47-6	o-Xylene	0.059	0.13	0.077	16.5	0.092025	0.35125	0.167951	0.48625	0.140924	0.51375	0.142307	0.3375	0.095556	0.2725	0.0693995	0.285	0.827	0.449	0.389	0.068	0.293	0.164	0.315	0.273	0.045	0.0474	0.173	ND	0.198	0.232	0.035	0.012	0.028	0.033	0.03	0.19	NT	NT	0.0548252	0.102604	0.023	0.297	0.06	0.14	0.073	0.831	0.069	0.39
105-05-5	p-Diethylbenzene	NT	NT	NT	NT	0.00928211	0.0595	0.0136373	0.0818	0.0215	0.0215	0.0097	0.0097	0.0104345	0.04	0.00781373	0.0245	NT	NT	NT	NT	NT	NT	NT	NT	NT	NT	NT	NT	NT	NT	NT	NT	NT	NT	NT	NT	NT	NT	NT	NT	0.3	2.9	NT	NT	0.008	0.077	0.01	0.042
627-20-3	Pentene (cis-2-)	NT	NT	NT	NT	0.0270916	0.123	0.0259725	0.0648	0.0160625	0.0578	0.0157854	0.058	0.017999	0.222	0.0330392	0.466	NT	NT	NT	NT	NT	NT	NT	NT	NT	NT	NT	NT	NT	NT	NT	NT	NT	NT	NT	NT	NT	NT	NT	NT	0.007	0.058	NT	NT	0.02	0.051	0.017	0.039
646-04-8	Pentene (trans-2-)	0.035	0.075	0.036	0.193	0.0485505	0.226	0.0576373	0.1486	0.0389571	0.1134	0.0499333	0.1164	0.0375897	0.402	0.0446275	0.674	NT	NT	NT	NT	NT	NT	NT	NT	NT	NT	NT	NT	NT	NT	NT	NT	NT	NT	NT	NT	NT	NT	NT	NT	0.008	0.077	NT	NT	0.024	0.111	0.024	0.058
622-96-8	p-Ethyltoluene	NT	NT	NT	NT	0.0269503	0.095	0.0477048	0.18	0.0464544	0.167778	0.0555162	0.174444	0.027205	0.0863333	0.0321351	0.142222	0.144	0.058	0.034	0.014	0.0155	0.021	0.047	0.057	0.0045	0.0111176	0.032	0.004	0.029	0.006	ND	0.004	0.005	ND	0.02	0.061	NT	NT	NT	NT	0.005	0.064	NT	NT	0.027	0.184	0.029	0.256
74-98-6	Propane	14.853	33.333	13.848	32.1	84.9256	261	104.779	530	76.2725	723.333	57.7146	177	52.1017	172.667	57.7523	710	505.596	285.085	148.703	112.886	503.591	199.983	12.585	95.41	161.523	23.3917	101.715	56.151	5.648	255.246	30.243	1.651	9.746	7.239	27	304	NT	NT	8.80928	23.3582	15.9	121	18.5	65.8	37.8	175	29.1	148
115-07-1	Propylene	0.371	1.21	0.311	0.553	0.539681	1.70667	0.736333	1.98333	0.557054	1.92667	0.522215	1.32	0.418236	1.30667	0.360458	1.74	0.382	0.084	0.114	0.118	0.163	0.134	1.552	0.146	0.3005	0.0935714	0.338	0.033	0.467	0.037	0.131	0.024	0.085	0.038	0.16	1.5	NT	NT	9.66945	54.5541	0.104	1.68	0.32	0.73	0.155	0.347	0.243	1.43
100-42-5	Styrene	NT	NT	NT	NT	0.0698717	0.51	0.0460846	0.18	0.0360156	0.29	0.0547148	0.2675	0.0268287	0.064625	0.0072549	0.0225	NT	NT	NT	NT	NT	NT	NT	NT	NT	NT	NT	NT	NT	NT	NT	NT	NT	NT	0.006	0.073	NT	NT	NT	NT	0.005	0.041	NT	NT	0.03	0.809	0.019	0.05
108-88-3	Toluene	5.489	11.843	0.727	14.071	0.823836	8.87143	1.28635	2.95714	1.10161	5.62857	1.02122	2.14286	0.813776	1.87143	0.856975	5	7.194	4.42	2.41	0.999	4.1305	1.235	1.172	2.075	0.5535	0.531714	1.817	0.243	1.408	5.1345	0.353	0.09	0.27	0.132	0.3	2.2	0.68	6.03	0.858191	5.2066	0.19	1.62	0.43	0.84	0.963	21	0.671	2.49
Key	NT (Not Tested): substance was not tested for in the study
	ND (Not Detected): substance was tested for in the study, but not detected above the limit of detection (unless LOD was substituted for within the study)
	NA (Not Available): no additional information was available in this study
[truncated: 29 more columns]

## Sheet: summary
Reference	Description	Distance from Closest OG site (ft)	Operation Type/Phase	Year(s) of data collection	# Samples	Sample Collection Duration	Sampling Frequency and Duration	Time of Day	Season
Denver-Julesburg Basin
CDPHE [17]	Ambient air monitoring in oil and gas region with active development	800	NA	2011-2015	250	3-hour integrated	Weekly for 365 days	6-9 AM	All
CDPHE [21]	Site specific air monitoring	850 - 1650	Completion	2012	36	3-hour integrated	Every 3 days for 30 days then daily for 16 days	6-9 AM	Summer
FRAPPE WAS [20]	Site specific air monitoring	>500	Various	2014	55	1-minute grab sample	Once	Daytime	Summer
Gilman et al. [13]	Site specific air monitoring	984	Production	2011	544	5-minute integrated	Every 30 minutes for 19 days	24-hours	Winter
Halliday et al. [42]	Ambient air monitoring in oil and gas region with active development	1600	Drilling, hydraulic fracturing	2014	28009	1-second per minute	2 months	24-hours	Summer
Helmig et al. [15]	Ambient air monitoring in region adjacent to active development	NA	NA	2014	47	3 –day integrated	Every 6-10 days for 86 days	24-hours	Summer
Swarthout [19]	Ambient air monitoring in oil and gas region with active development	NA	NA	2011	550	1-minute grab sample	Hourly for 23 days	24-hours	Spring
Thompson [16]	Ambient air monitoring in oil and gas region with active development	350 - 1,400	Production	2013	30	5-minute grab samples, 3-hour integrated, 24-hour integrated	Random sampling over 77 days	24-hours	Spring
Piceance Basin
Colborn [14]	Site specific air monitoring	3700	Drilling/ production	2010/2011	48	24-hour integrated	Weekly for 365 days	24-hours	All
Garfield Cty. [18]	Ambient air monitoring in oil and gas region with active development	NA	NA	2008 - 2015	390	24-hour integrated	Weekly for 365 days	24-hours	All
Garfield Cty. [18]	Ambient air monitoring in oil and gas region with active development	NA	NA	2010 - 2015	323	24-hour integrated	Weekly for 365 days	24-hours	All
